# Supplementary material for: The Cost-Effectiveness of Antibiotic Prophylaxis for Patients at Risk of Infective Endocarditis
Source: PubMed Central journal article supplement — Circulation. 2016 Nov 14;134(20):1568–78. doi: 10.1161/CIRCULATIONAHA.116.022047 (PMC5106088; doi:10.1161/circulationaha.116.022047), 2016-11-14
Supplement: cir-134-1568-s001.pdf [file cir-134-1568-s001.pdf]

## Supplemental Material

### THE COST-EFFECTIVENESS OF ANTIBIOTIC PROPHYLAXIS FOR PATIENTS AT-RISK OF INFECTIVE ENDOCARDITIS

Matthew Franklin, Allan Wailoo, Mark J Dayer, Simon Jones, Bernard Prendergast, Larry M Baddour, Peter B Lockhart, Martin H Thornhill

| Contents                                                                                                            | Page |
|---------------------------------------------------------------------------------------------------------------------|------|
| <b>1. Supplementary Methods</b>                                                                                     |      |
| Calculation for risk of IE following an (un)protected high-risk dental procedure                                    | 2    |
| <b>2. Supplementary Tables</b>                                                                                      |      |
| Table S1. Logic behind the risk per protected and unprotected dental procedure for all-at-risk patients calculation | 4    |
| Table S2. Logic behind the risk per protected and unprotected dental procedure for high-risk patients calculation   | 6    |
| <b>3. Supplementary References</b>                                                                                  | 8    |

## 1. Supplementary Methods

### Calculation for risk of IE following an (un)protected high-risk (invasive) dental procedure

A similar method for calculating risk of IE following a dental procedure for patients with a predisposing cardiac condition (PCC) was incorporated in the NICE 2008 model<sup>1,2</sup> and by three other studies.<sup>3-5</sup> This calculation was:

*Risk of IE following an unprotected dental procedure =*

*(“Incidence of IE” multiplied by “proportion of incident cases that would have occurred with a PCC” multiplied by “proportion of PCC IE cases attributed to dental procedures”) divided by (“number of dental procedures per patient per year” multiplied by “prevalence of PCC”)*

**Equation 1: Equation to calculate the risk of IE following an unprotected dental procedure**

A slightly different and simpler way of presenting Equation 1 is presented as part of Equation 2, where people with a PCC are now defined as people “at-risk” of IE, of which people with PCC are the majority. The steps used to get to the point of estimating Equation 2 are described in this Appendix.

*Risk of IE following an (un)protected dental procedure =*  
*“The risk of IE in an at-risk population per year multiplied by*  
*“Number of dental procedures/patient/year for at-risk patients”*

**Equation 2: Alternative equation to calculate the risk of IE following an unprotected dental procedure**

It is information provided by Dayer, *et al* (2015)<sup>6</sup> and Duval, *et al* (2006)<sup>5</sup>, supplemented with data obtained from HES and ONS<sup>7</sup> which provides the basis for calculating the risk of IE following an unprotected dental procedure for this study. The logic for this calculation using the figures presented in Table 1 are now presented in Table A1 and Table A2 for four hypothetical patient groups:

- 1) **All-at-risk** patients undergoing a **protected** dental procedure (**AP is used**), Table S1;
- 2) **All-at-risk** patients undergoing an **unprotected** dental procedure (**AP not used**), Table S1;
- 3) **High-risk** patients undergoing a **protected** dental procedure (**AP is used**), Table S2;
- 4) **High-risk** patients undergoing an **unprotected** dental procedure (**AP not used**), Table S2.

In order to describe the calculation used to estimate the risk of IE following a protected dental procedure, consider the calculation for the first hypothetical patient group (All-at-risk patients undergoing a protected dental procedure (AP is used))

using the figures presented in Table 1 (presented here in *Italic* font) and calculations presented in Table S1 (presented here in **Bold** font).

Step 1 – estimate “Number of IE cases in all-at-risk group”: The “Number of IE cases per year” (*1486*) is multiplied by the “Incident cases that would have occurred for at risk-patients” (*0.0521*) which estimates the “Number of IE cases in all-at-risk group” ( $1486 * 0.0521 = \mathbf{774.46}$ ).

Step 2 – estimate “Number of IE cases due to dental work for all-at-risk”: The “Number of IE cases in all-at-risk group” (**774.46**) is multiplied by “IE cases attributed to dental procedures in at-risk group” (*0.052*) which estimates the “Number of IE cases due to dental work for all-at-risk” ( $774.46 * 0.052 = \mathbf{40.13}$ ).

Step 3 – estimate “Size of the population of all-at-risk patients”: The size of the population of interest (for the purpose of this analysis, “Population of England (year 2012)”: *51.4 million people*) multiplied by the “Prevalence of all-at-risk group” (*0.033*) estimates the “Size of the population of all-at-risk patients” ( $51.4 \text{ mil} * 0.033 = \mathbf{1,696,590}$ ).

Step 4 – estimate “Risk of IE in this all-at-risk population per year”: The “Number of IE cases due to dental work for all-at-risk” (**40.13**) multiplied by “Size of the population of all-at-risk patients” (**1,696,590**) estimates the “The risk of IE in this all-at-risk population per year” ( $40.13 * 1,696,590 = \mathbf{0.000024}$ ).

Step 5 – estimate “Risk per protected dental procedure for all-at-risk” (Equation 2): “Risk of IE in this all-at-risk population per year” (**0.000024**) multiplied by “Number of dental procedures/patient/year for at-risk patients” (*1.32*) estimates “Risk per protected dental procedure for all-at-risk” ( $0.000024 * 1.32 = \mathbf{0.000018}$ )

Step 6 – estimate “Risk per million per protected dental procedure for all-at-risk”: “Risk per protected dental procedure for all-at-risk” (**0.000018**) multiplied by one million people estimates “Risk per million per protected dental procedure for high-risk” ( $0.000018 * 1 \text{ million people} = \mathbf{17.87}$ )

When accounting for the increase in cases of IE due to the cessation of AP (unprotected dental procedures), these same steps are taken; however, steps 1 and 2 are replaced by one step which involves adding the “Yearly increase in IE due to no AP for all-at-risk” (**418.8**) to the “Number of IE cases due to dental work for all-at-risk” before the cessation of AP (**40.13**), which now estimates the “Number of IE cases due to dental work for all-at-risk” without the use of AP ( $418.8 + 40.13 = \mathbf{458.93}$ ). These estimated figures are all presented in Table S1 for all-at-risk patients (as described in this example) and Table S2 for high-risk patients.

## 2. Supplementary Tables

**Table S1. Logic behind the risk per protected and unprotected dental procedure for all-at-risk patients calculation**

| Description of estimate                                                                                       | Estimate        | Calculation                         | Description of calculation                                                                                                        |
|---------------------------------------------------------------------------------------------------------------|-----------------|-------------------------------------|-----------------------------------------------------------------------------------------------------------------------------------|
| <b>Protected dental procedure (AP is used) – all figures for this calculation are presented in Table 1</b>    |                 |                                     |                                                                                                                                   |
| Number of IE cases per year                                                                                   | 1486            | -                                   | -                                                                                                                                 |
| Number of IE cases in all-at-risk group                                                                       | 774.46          | $1486 * 0.0521$                     | Number of IE cases per year *<br>Incident cases that would have occurred for all-at-risk patients                                 |
| Number of IE cases due to dental work for all-at-risk                                                         | 40.13           | $774.46 * 0.052$                    | Number of IE cases in all-at-risk group *<br>IE cases attributed to dental procedures in all-at-risk group                        |
| Size of the population of all-at-risk patients                                                                | 1,696,590       | $51.4\text{mil} * 0.033$            | Population of England (year 2012) *<br>Prevalence of all-at-risk group                                                            |
| Risk of IE in this all-at-risk population per year                                                            | 0.000024        | $40.13 / 1,696,590$                 | Number of IE cases due to dental work *<br>Size of the population of all-at-risk patients                                         |
| <b>Risk per protected dental procedure for all-at-risk</b>                                                    | <b>0.000018</b> | <b><math>0.000024 * 1.32</math></b> | <b>Risk of IE in this all-at-risk population per year *<br/>Number of dental procedures/patient/year for all-at-risk patients</b> |
| Risk per million per protected dental procedure for high-risk                                                 | <b>17.87</b>    | $0.000018 * 1\text{mil}$            | Risk per unprotected dental procedure for all-at-risk *<br>One million people                                                     |
| <b>Unprotected dental procedure (AP not used) – all figures for this calculation are presented in Table 1</b> |                 |                                     |                                                                                                                                   |
| Monthly increase in IE due to no AP for all-at-risk                                                           | 34.9            | -                                   | -                                                                                                                                 |
| Yearly increase in IE due to no AP for all-at-risk                                                            | 418.8           | $34.9 * 12$                         | Monthly increase in IE due to no AP for all-at-risk *<br>12 months in a year                                                      |
| Number of cases due to dental work for all-at-risk                                                            | 458.93          | $40.13 + 418.8$                     | Number of IE cases due to dental work +<br>Yearly increase in IE due to no AP for all-at-risk                                     |

|                                                                   |                 |                        |                                                                                                                                                           |
|-------------------------------------------------------------------|-----------------|------------------------|-----------------------------------------------------------------------------------------------------------------------------------------------------------|
| Size of the population of all-at-risk patients                    | 1,696,590       | 51.4mil * 0.033        | Population of England (year 2012) *<br>Prevalence of all-at-risk group                                                                                    |
| The risk of IE in this population per year                        | 0.000271        | 458.93 /<br>1,696,590  | Number of cases due to dental work for all-at-risk *<br>Size of the population of all-at-risk patients                                                    |
| <b>Risk per unprotected dental procedure for all-at-risk</b>      | <b>0.000204</b> | <b>0.000271 * 1.32</b> | <b>The risk of IE in this all-at-risk population per year</b><br>*                                                                                        |
| Risk per million per unprotected dental procedure for all-at-risk | <b>204.33</b>   | 0.000204 * 1mil        | <b>Number of dental procedures/patient/year for all-at-risk patients</b><br>Risk per unprotected dental procedure for all-at-risk *<br>One million people |

---

AP: Antibiotic Prophylaxis; IE: Infective Endocarditis.

**Table S2. Logic behind the risk per protected and unprotected dental procedure for high-risk patients calculation**

| Description of estimate                                                                                       | Estimate        | Calculation            | Description of calculation                                                                                                        |
|---------------------------------------------------------------------------------------------------------------|-----------------|------------------------|-----------------------------------------------------------------------------------------------------------------------------------|
| <b>Protected dental procedure (AP is used) – all figures for this calculation are presented in Table 1</b>    |                 |                        |                                                                                                                                   |
| Number of IE cases per year                                                                                   | 1486            | -                      | -                                                                                                                                 |
| Number of IE cases in high-risk group                                                                         | 428             | 1486 * 0.288           | Number of IE cases per year *<br>Incident cases that would have occurred for high-risk patients                                   |
| Number of IE cases due to dental work for high-risk                                                           | 13.38           | 428* 0.031             | Number of IE cases in high-risk group *<br>IE cases attributed to dental procedures in high-risk group                            |
| Size of the population of high-risk patients                                                                  | 301,244         | 51.4mil * 0.0059       | Population of England (year 2012) *<br>Prevalence of high-risk group                                                              |
| The risk of IE in this population per year                                                                    | 0.000044        | 13.38 / 301,244        | Number of IE cases due to dental work *<br>Size of the population of high-risk patients                                           |
| <b>Risk per protected dental procedure for high-risk</b>                                                      | <b>0.000135</b> | <b>0.000044 * 0.33</b> | <b>The risk of IE in this high-risk population per year *<br/>Number of dental procedures/patient/year for high-risk patients</b> |
| Risk per million per protected dental procedure for high-risk                                                 | <b>134.58</b>   | 0.000135 * 1mil        | Risk per protected dental procedure for high-risk *<br>One million people                                                         |
| <b>Unprotected dental procedure (AP not used) – all figures for this calculation are presented in Table 1</b> |                 |                        |                                                                                                                                   |
| Monthly increase in IE due to no AP for high-risk                                                             | 13.7            | -                      | -                                                                                                                                 |
| Yearly increase in IE due to no AP for high-risk                                                              | 164.0           | 13.67 * 12             | Monthly increase in IE due to no AP for high-risk *<br>12 months in a year                                                        |
| Number of cases due to dental work for high-risk                                                              | 177.42          | 13.38 + 164.04         | Number of IE cases due to dental work +<br>Yearly increase in IE due to no AP for high-risk                                       |
| Size of the population of high-risk patients                                                                  | 301,244         | 51.4mil * 0.0059       | Population of England (year 2012) *                                                                                               |

|                                                                 |                 |                        |                                                                                                                                     |
|-----------------------------------------------------------------|-----------------|------------------------|-------------------------------------------------------------------------------------------------------------------------------------|
| The risk of IE in this population per year                      | 0.000271        | 177.42 / 301,244       | Prevalence of high-risk group<br>Number of cases due to dental work for high-risk *<br>Size of the population of high-risk patients |
| <b>Risk per unprotected dental procedure for high-risk</b>      | <b>0.001785</b> | <b>0.000271 * 0.33</b> | <b>The risk of IE in this high-risk population per year *<br/>Number of dental procedures/patient/year for high-risk patients</b>   |
| Risk per million per unprotected dental procedure for high-risk | <b>1785.13</b>  | 0.001785 * 1mil        | Risk per unprotected dental procedure for high-risk *<br>One million people                                                         |

---

AP: Antibiotic Prophylaxis; IE: Infective Endocarditis.

### 3. Supplementary References:

1. National Institute for Health and Care Excellence (NICE). Prophylaxis against infective endocarditis. 2008:NICE Clinical Guideline No 64. <http://www.nice.org.uk/guidance/cg64> Accessed: June 23rd, 2015
2. National Institute for Health and Care Excellence (NICE). Prophylaxis against infective endocarditis - Appendix 6. de novo economic analysis. 2008:NICE Clinical Guideline No 64 - Appendix 6. <http://www.nice.org.uk/guidance/cg64> Accessed: June 23rd, 2015
3. Agha Z, Lofgren RP and VanRuiswyk JV. Is antibiotic prophylaxis for bacterial endocarditis cost-effective? *Medical decision making*. 2005;25:308-20.
4. Clemens JD and Ransohoff DF. A quantitative assessment of pre-dental antibiotic prophylaxis for patients with mitral-valve prolapse. *JChronic Dis*. 1984;37:531-544.
5. Duval X, Alla F, Hoen B, Danielou F, Larrieu S, Delahaye F, Leport C and Briancon S. Estimated risk of endocarditis in adults with predisposing cardiac conditions undergoing dental procedures with or without antibiotic prophylaxis. *Clinical infectious diseases*. 2006;42:e102-7.
6. Dayer MJ, Jones S, Prendergast B, Baddour LM, Lockhart PB and Thornhill MH. Incidence of infective endocarditis in England, 2000-13: a secular trend, interrupted time-series analysis. *Lancet*. 2015;385:1219-28.
7. Office of National Statistics (ONS). Population prediction statistics for 2012/2013. 2013. <http://www.ons.gov.uk/ons/rel/pop-estimate/population-estimates-for-uk--england-and-wales--scotland-and-northern-ireland/2013/stb---mid-2013-uk-population-estimates.html> Accessed: January 11th, 2016
